# Supplementary material
Source: PubMed Central journal article supplement (PMC7189278)
Supplement: advancesADV2019001142C-suppl1.pdf [file advancesADV2019001142C-suppl1.pdf]

**American Society of Hematology 2019 Guidelines for Sickle Cell Disease: Cerebrovascular Disease**

**Supplement 1: Panel and Systematic Review Team Membership**

**Table:** Panel Members

| <b>ASH Guideline Panel on Sickle Cell Disease Cerebrovascular Disease</b> |                     |                                    |
|---------------------------------------------------------------------------|---------------------|------------------------------------|
| 1                                                                         | Michael DeBaun      | Co-chair, pediatric hematologist   |
| 2                                                                         | M. Hassan Murad     | Co-chair, methodologist, internist |
| 3                                                                         | Tabitha Barber      | Patient representative             |
| 4                                                                         | Christine K. Fox    | Pediatric neurologist              |
| 5                                                                         | Lori C. Jordan      | Pediatric neurologist              |
| 6                                                                         | Allison A. King     | Pediatric hematologist             |
| 7                                                                         | Fenella Kirkham     | Pediatric neurologist              |
| 8                                                                         | Michael A. Kraut    | Neuroradiologist                   |
| 9                                                                         | Robert C. McKinstry | Pediatric radiologist              |
| 10                                                                        | Maria Rivera        | Patient representative             |
| 11                                                                        | Jeffrey Schatz      | Clinical psychologist              |
| 12                                                                        | Paul Telfer         | Adult hematologist                 |
| 13                                                                        | Elliott Vichinsky   | Pediatric hematologist             |

**Table:** Mayo Clinic Evidence-Based Practice Center Researchers Contributing to Evidence Syntheses

| <b>Mayo EPC Researchers</b> |                  |                        |
|-----------------------------|------------------|------------------------|
| 1                           | M. Hassan Murad  | Principal Investigator |
| 2                           | Lubna Daraz      | Research Fellow        |
| 3                           | Ahmad Kunbaz     | Research Fellow        |
| 4                           | Abdul M. Majzoub | Research Fellow        |
| 5                           | Oscar Ponce      | Research Fellow        |
