# Supplementary material
Source: PubMed Central journal article supplement (PMC7189278)
Supplement: advancesADV2019001142C-suppl4.pdf [file advancesADV2019001142C-suppl4.pdf]

**Supplement 4: Search Strategies**

Recommendations 1-10: Cerebrovascular Disease

1. Database(s): Embase 1988 to 2017 Week 30, Ovid MEDLINE(R) Epub Ahead of Print, In-Process & Other Non-Indexed Citations, Ovid MEDLINE(R) Daily and Ovid MEDLINE(R) 1946 to July 24<sup>th</sup>, 2017.

| #  | Searches                                                                                                                                                                                                                                                                                                                                                                                                                                                                                                                                                                                                                                                                                                                                                                                                                                                                                                                                                 | Results |
|----|----------------------------------------------------------------------------------------------------------------------------------------------------------------------------------------------------------------------------------------------------------------------------------------------------------------------------------------------------------------------------------------------------------------------------------------------------------------------------------------------------------------------------------------------------------------------------------------------------------------------------------------------------------------------------------------------------------------------------------------------------------------------------------------------------------------------------------------------------------------------------------------------------------------------------------------------------------|---------|
| 1  | exp Anemia, Sickle Cell/                                                                                                                                                                                                                                                                                                                                                                                                                                                                                                                                                                                                                                                                                                                                                                                                                                                                                                                                 | 46344   |
| 2  | exp Hemoglobin, Sickle/                                                                                                                                                                                                                                                                                                                                                                                                                                                                                                                                                                                                                                                                                                                                                                                                                                                                                                                                  | 6407    |
| 3  | ((((drepanocytic or "haemoglobin s" or "hemoglobin s" or "Hb SS" or hbs or sickle or "sickle cell" or sickling or ss) adj2 (anaemia* or anemia* or disease* or disorder*)) or ((Hb S or HbS or sickle) adj3 (disease* or thalassemi* or thalassaemi*)) or (sickle and SCD) or drepanocyt* or drepanocytemia* or drepanocytoses or drepanocytosis or "haemoglobin C disease" or "haemoglobin D disease" or "haemoglobin E disease" or "haemoglobin S" or "haemoglobin SC" or "haemoglobin SE" or "haemoglobin SS" or "Hb C disease" or "Hb D disease" or "Hb E disease" or "Hb SC" or "Hb SS" or "HbACor Hb SE" or HbAS or HbSC or HbSS or "hemoglobin C disease" or "hemoglobin D disease" or "hemoglobin E disease" or "hemoglobin S" or "hemoglobin SC" or "hemoglobin SE" or "hemoglobin SS" or meniscocyt* or meniscocytoses or meniscocytosis or "SC disease" or "SC diseases" or "sickle cell*" or sickled or sicklemlia or sickling).ti,ab,hw,kw. | 60611   |
| 4  | 1 or 2 or 3                                                                                                                                                                                                                                                                                                                                                                                                                                                                                                                                                                                                                                                                                                                                                                                                                                                                                                                                              | 61233   |
| 5  | exp Cerebrovascular Disorders/                                                                                                                                                                                                                                                                                                                                                                                                                                                                                                                                                                                                                                                                                                                                                                                                                                                                                                                           | 795153  |
| 6  | ((((brain* or cerebr* or vertebrobasil* or hemispher* or intracran* or intracerebral or infratentorial or supratentorial or MCA* or "anterior circulation" or "basilar artery" or "vertebral artery" or subcortical or cortical or choroidal) adj5 (ischemi* or ischaemi* or infarct* or thrombo* or phlebothrombo* or stenosis or emboli* or occlus* or "vaso-occlus*" or vasocclus* or vasoocclus* or obstruction* or hypoxi* or accident* or abnormalit* or vasculopath* or vasospasm* or disorder* or damage* or disease* or lesion* or insufficien*)) or ((ischemi* or ischaem*) adj5 (apoplex* or attack* or accident* or seizure* or arrest* or injur* or failure* or lesion* or insult*)) or CVA or "incomplete infarct*" or "silent infarct*" or stroke*).ti,ab,hw,kw.                                                                                                                                                                          | 1424380 |
| 7  | exp Cerebrovascular Circulation/                                                                                                                                                                                                                                                                                                                                                                                                                                                                                                                                                                                                                                                                                                                                                                                                                                                                                                                         | 65969   |
| 8  | Ultrasonography, Doppler, Transcranial/                                                                                                                                                                                                                                                                                                                                                                                                                                                                                                                                                                                                                                                                                                                                                                                                                                                                                                                  | 7419    |
| 9  | ((((brain* or cerebr* or vertebrobasil* or hemispher* or intracran* or intracerebral or infratentorial or supratentorial or MCA* or anterior circulation or "basilar artery" or "vertebral artery" or subcortical or cortical or choroidal) adj3 (hemodynamics or haemodynamics or "blood flow" or "blood velocit*" or volume)) or (transcranial adj3 (doppler or ultrasound or sonograph* or ultrasonograph*))).ti,ab,hw,kw.                                                                                                                                                                                                                                                                                                                                                                                                                                                                                                                            | 142868  |
| 10 | exp Cerebral Arteries/di                                                                                                                                                                                                                                                                                                                                                                                                                                                                                                                                                                                                                                                                                                                                                                                                                                                                                                                                 | 8       |
| 11 | Blood Volume Determination/                                                                                                                                                                                                                                                                                                                                                                                                                                                                                                                                                                                                                                                                                                                                                                                                                                                                                                                              | 3365    |
| 12 | Blood Flow Velocity/                                                                                                                                                                                                                                                                                                                                                                                                                                                                                                                                                                                                                                                                                                                                                                                                                                                                                                                                     | 85785   |
| 13 | (TCD adj3 (flow* or velocit*)).ti,ab,hw,kw.                                                                                                                                                                                                                                                                                                                                                                                                                                                                                                                                                                                                                                                                                                                                                                                                                                                                                                              | 1009    |

|    |                                                                                                                                                                                                                                                                                                                                                                                                                                                                                                                                                                                                                                                                                                                                                                                        |          |
|----|----------------------------------------------------------------------------------------------------------------------------------------------------------------------------------------------------------------------------------------------------------------------------------------------------------------------------------------------------------------------------------------------------------------------------------------------------------------------------------------------------------------------------------------------------------------------------------------------------------------------------------------------------------------------------------------------------------------------------------------------------------------------------------------|----------|
| 14 | exp Cerebral Infarction/                                                                                                                                                                                                                                                                                                                                                                                                                                                                                                                                                                                                                                                                                                                                                               | 88572    |
| 15 | Brain Infarction/                                                                                                                                                                                                                                                                                                                                                                                                                                                                                                                                                                                                                                                                                                                                                                      | 45233    |
| 16 | Stroke/                                                                                                                                                                                                                                                                                                                                                                                                                                                                                                                                                                                                                                                                                                                                                                                | 201470   |
| 17 | Stroke, Lacunar/                                                                                                                                                                                                                                                                                                                                                                                                                                                                                                                                                                                                                                                                                                                                                                       | 1099     |
| 18 | ("cerebral vasculopath*" or "cerebrovascular accident*" or "cerebral vascular accident*" or ((asymptomatic* or silent* or nonsymptomatic* or unsymptomatic* or "non-symptomatic*" or quiet* or symptomfree or symptomfree or symptomless or "symptom-less" or occult or "free of symptom" or "free of symptoms" or subclinical* or covert* or incomplete*) adj5 (infarct* or ischemi* or ischaemi* or stroke*)) or ((cerebral or cerebellar or cerebrovascular or choroidal or hemispher* or cortical or subcortical or brain*) adj3 (infarct* or ischemi* or ischaemi* or stroke*)) or ((ischemic or ischaemic or cerebrovascular) adj2 (event* or injur* or complication*)) or ((MRI or "magnetic resonance imaging" or neuroimaging or "white matter") adj3 abnormal*).ti,ab,hw,kw. | 491537   |
| 19 | or/5-18                                                                                                                                                                                                                                                                                                                                                                                                                                                                                                                                                                                                                                                                                                                                                                                | 1811262  |
| 20 | 4 and 19                                                                                                                                                                                                                                                                                                                                                                                                                                                                                                                                                                                                                                                                                                                                                                               | 6483     |
| 21 | exp controlled study/                                                                                                                                                                                                                                                                                                                                                                                                                                                                                                                                                                                                                                                                                                                                                                  | 5811944  |
| 22 | exp Randomized Controlled Trial/                                                                                                                                                                                                                                                                                                                                                                                                                                                                                                                                                                                                                                                                                                                                                       | 915994   |
| 23 | exp triple blind procedure/                                                                                                                                                                                                                                                                                                                                                                                                                                                                                                                                                                                                                                                                                                                                                            | 166      |
| 24 | exp Double-Blind Method/                                                                                                                                                                                                                                                                                                                                                                                                                                                                                                                                                                                                                                                                                                                                                               | 280263   |
| 25 | exp Single-Blind Method/                                                                                                                                                                                                                                                                                                                                                                                                                                                                                                                                                                                                                                                                                                                                                               | 53493    |
| 26 | exp latin square design/                                                                                                                                                                                                                                                                                                                                                                                                                                                                                                                                                                                                                                                                                                                                                               | 338      |
| 27 | exp Placebos/                                                                                                                                                                                                                                                                                                                                                                                                                                                                                                                                                                                                                                                                                                                                                                          | 300518   |
| 28 | exp Placebo Effect/                                                                                                                                                                                                                                                                                                                                                                                                                                                                                                                                                                                                                                                                                                                                                                    | 8693     |
| 29 | exp clinical trials as topic/                                                                                                                                                                                                                                                                                                                                                                                                                                                                                                                                                                                                                                                                                                                                                          | 562292   |
| 30 | ((control* adj3 study) or (control* adj3 trial) or (randomized adj3 study) or (randomized adj3 trial) or (randomised adj3 study) or (randomised adj3 trial) or "pragmatic clinical trial" or (random* adj1 allocat*) or (doubl* adj blind*) or (doubl* adj mask*) or (singl* adj blind*) or (singl* adj mask*) or (tripl* adj blind*) or (tripl* adj mask*) or (trebl* adj blind*) or (trebl* adj mask*) or "latin square" or placebo* or nocebo* or random* or trial or groups).mp,pt.                                                                                                                                                                                                                                                                                                | 11406054 |
| 31 | or/21-30                                                                                                                                                                                                                                                                                                                                                                                                                                                                                                                                                                                                                                                                                                                                                                               | 11499518 |
| 32 | 20 and 31                                                                                                                                                                                                                                                                                                                                                                                                                                                                                                                                                                                                                                                                                                                                                                              | 2065     |
| 33 | (exp animals/ or exp nonhuman/) not exp humans/                                                                                                                                                                                                                                                                                                                                                                                                                                                                                                                                                                                                                                                                                                                                        | 8938125  |
| 35 | 32 not (33 or 34)                                                                                                                                                                                                                                                                                                                                                                                                                                                                                                                                                                                                                                                                                                                                                                      | 1998     |
| 36 | limit 35 to (editorial or erratum or letter or note or addresses or autobiography or bibliography or biography or blogs or comment or dictionary or directory or interactive tutorial or interview or lectures or legal cases or legislation or news or newspaper article or overall or patient education handout or periodical index or portraits or published erratum or video-audio media or webcasts) [Limit not valid in Embase,Ovid MEDLINE(R),Ovid MEDLINE(R) Daily Update,Ovid MEDLINE(R) In-Process,Ovid MEDLINE(R) Publisher; records were retained]                                                                                                                                                                                                                         | 52       |
| 38 | limit 37 to ("all infant (birth to 23 months)" or "all child (0 to 18 years)" or "newborn infant (birth to 1 month)" or "infant (1 to 23 months)" or "preschool child (2 to 5 years)" or "child (6 to 12 years)" or "adolescent (13 to 18 years)") [Limit not valid in Embase; records were retained]                                                                                                                                                                                                                                                                                                                                                                                                                                                                                  | 1817     |

|    |                                                                                                                                                                                                                                                                                        |      |
|----|----------------------------------------------------------------------------------------------------------------------------------------------------------------------------------------------------------------------------------------------------------------------------------------|------|
| 39 | limit 38 to (embryo or infant or child or preschool child <1 to 6 years> or school child <7 to 12 years> or adolescent <13 to 17 years>) [Limit not valid in Ovid MEDLINE(R),Ovid MEDLINE(R) Daily Update,Ovid MEDLINE(R) In-Process,Ovid MEDLINE(R) Publisher; records were retained] | 1138 |
| 41 | limit 40 to (adult <18 to 64 years> or aged <65+ years>) [Limit not valid in Ovid MEDLINE(R),Ovid MEDLINE(R) Daily Update,Ovid MEDLINE(R) In-Process,Ovid MEDLINE(R) Publisher; records were retained]                                                                                 | 652  |
| 43 | 37 not 42                                                                                                                                                                                                                                                                              | 1681 |
| 45 | limit 44 to yr="2016 -Current"                                                                                                                                                                                                                                                         | 263  |
| 46 | remove duplicates from 45                                                                                                                                                                                                                                                              | 214  |

2. Database(s): Embase 1988 to 2017 Week 30, Ovid MEDLINE(R) 1946 to Present and Epub Ahead of Print, In-Process & Other Non-Indexed Citations and Ovid MEDLINE(R) Daily

| #  | Searches                                                                                                                                                                                                                                                                                                                                                                                                                                                                                      | Results |
|----|-----------------------------------------------------------------------------------------------------------------------------------------------------------------------------------------------------------------------------------------------------------------------------------------------------------------------------------------------------------------------------------------------------------------------------------------------------------------------------------------------|---------|
| 1  | exp Anemia, Sickle Cell/                                                                                                                                                                                                                                                                                                                                                                                                                                                                      | 46346   |
| 2  | ((haemoglobin adj2 s) or (haemoglobin adj2 ss) or (hemoglobin adj2 SS) or (hemoglobin adj2 s) or (Hb adj2 SS) or (Hb adj2 S) or HbS or HbSS or sickle or "sickle cell" or sickling or SS or sickled or Drepanocyt* or meniscocyt*).mp.                                                                                                                                                                                                                                                        | 151452  |
| 3  | 1 or 2                                                                                                                                                                                                                                                                                                                                                                                                                                                                                        | 151576  |
| 4  | exp alpha-Thalassemia/                                                                                                                                                                                                                                                                                                                                                                                                                                                                        | 7157    |
| 5  | ((alpha adj2 (thalassemia* or thalassaemia*)) or alphathalassemia or alphathalassaemia or (hemoglobin adj2 H) or (haemoglobin adj2 H) or HbH or (A adj2 (thalassemia* or thalassaemia*)) or (alpha adj2 thal)).mp.                                                                                                                                                                                                                                                                            | 12552   |
| 6  | 4 or 5                                                                                                                                                                                                                                                                                                                                                                                                                                                                                        | 14546   |
| 7  | exp beta-Thalassemia/                                                                                                                                                                                                                                                                                                                                                                                                                                                                         | 18198   |
| 8  | ((b adj2 (thalassemia* or thalassaemia*)) or betathalassemia or betathalassaemia or bethathalassemia or bethathalassaemia or (Betha* adj2 (thalassemia* or thalassaemia*)) or (Beta* adj2 (thalassemia* or thalassaemia*)) or (betha adj thal) or (beta adj tal) or HbF or "Hb F" or (haemoglobin adj2 F) or (hemoglobin adj2 F) or ((thalassemia* or thalassaemia*) adj2 intermedia*) or ((thalassemia* or thalassaemia*) adj2 major*) or ((thalassemia* or thalassaemia*) adj2 minor*)).mp. | 38636   |
| 9  | 7 or 8                                                                                                                                                                                                                                                                                                                                                                                                                                                                                        | 38636   |
| 10 | exp delta-Thalassemia/                                                                                                                                                                                                                                                                                                                                                                                                                                                                        | 99      |
| 11 | (delta or (D adj2 (thalassemia* or thalassaemia*))).mp.                                                                                                                                                                                                                                                                                                                                                                                                                                       | 248275  |
| 12 | 10 or 11                                                                                                                                                                                                                                                                                                                                                                                                                                                                                      | 248275  |
| 13 | 9 and 12                                                                                                                                                                                                                                                                                                                                                                                                                                                                                      | 1209    |

|    |                                                                                                                                                                                                                                                                                                                                                                                                                                                                                                                     |       |
|----|---------------------------------------------------------------------------------------------------------------------------------------------------------------------------------------------------------------------------------------------------------------------------------------------------------------------------------------------------------------------------------------------------------------------------------------------------------------------------------------------------------------------|-------|
| 14 | (deltabeta or deltabetha or "delta betha" or "delta beta").mp.                                                                                                                                                                                                                                                                                                                                                                                                                                                      | 1599  |
| 15 | 13 or 14                                                                                                                                                                                                                                                                                                                                                                                                                                                                                                            | 2315  |
| 16 | ((((Hemoglobin or haemoglobin or Hb) adj2 lepore) or Hblepore or ((Hemoglobin or haemoglobin or Hb) adj2 Hollandia) or HbHollandia).mp.                                                                                                                                                                                                                                                                                                                                                                             | 466   |
| 17 | ((((Hemoglobin or haemoglobin or Hb) adj2 O) or HbO or ((Hemoglobin or haemoglobin or Hb) adj2 arab*) or HbArab).mp.                                                                                                                                                                                                                                                                                                                                                                                                | 6230  |
| 18 | ((((Hemoglobin or haemoglobin or Hb) adj2 D) or HbD or ((Hemoglobin or haemoglobin or Hb) adj2 Punjab) or HbPunjab or ((Hemoglobin or haemoglobin or Hb) adj2 "los angeles") or HbLosAngeles).mp.                                                                                                                                                                                                                                                                                                                   | 5948  |
| 19 | ("haemoglobin E" or "hemoglobin E" or "Hb E" or HbE).mp.                                                                                                                                                                                                                                                                                                                                                                                                                                                            | 11018 |
| 20 | 6 or 15 or 16 or 17 or 18 or 19                                                                                                                                                                                                                                                                                                                                                                                                                                                                                     | 37676 |
| 21 | 3 and 20                                                                                                                                                                                                                                                                                                                                                                                                                                                                                                            | 5703  |
| 22 | ((((Haemoglobin or hemoglobin or Hb) adj2 (SO or SSO or SD or SSD or Slepore or SSlepore)) or haemoglobinSO or hemoglobin SO or HbSO or HaemoglobinSSO or hemoglobinSSO or HbSSO or HaemoglobinSD or hemoglobinSD or HbSD or HaemoglobinSSD or hemoglobinSSD or HbSSD or HaemoglobinSlepore or hemoglobinSlepore or HbSlepore or HaemoglobinSSlepore or hemoglobinSSlepore or HbSSlepore or "haemoglobin SE" or "hemoglobin SE" or "Hb SE" or "HbSE" or "haemoglobin SC" or "hemoglobin SC" or "Hb SC" or HbSC).mp. | 4270  |
| 23 | 21 or 22                                                                                                                                                                                                                                                                                                                                                                                                                                                                                                            | 9673  |
| 24 | exp Ultrasonography, Doppler, Transcranial/                                                                                                                                                                                                                                                                                                                                                                                                                                                                         | 7424  |
| 25 | exp transcranial doppler/                                                                                                                                                                                                                                                                                                                                                                                                                                                                                           | 2604  |
| 26 | ((((transcranial or brain or cranial or head) and (sonograph* or ultrasonograph* or ecograph* or doppler or echogram* or echosound* or sonogram* or sonograph* or ultrasonic or ultrasound)) or neurosonolog*).mp.                                                                                                                                                                                                                                                                                                  | 99679 |
| 27 | 24 or 25 or 26                                                                                                                                                                                                                                                                                                                                                                                                                                                                                                      | 99679 |
| 28 | 23 and 27                                                                                                                                                                                                                                                                                                                                                                                                                                                                                                           | 156   |

3. Database(s): **Embase** 1988 to 2017 Week 30, Ovid MEDLINE(R) 1946 to Present and Epub Ahead of Print, In-Process & Other Non-Indexed Citations and Ovid MEDLINE(R) Daily

| #  | Searches                                                                                                                                                                                                                                                                                                                                                                                                                                                                                      | Results |
|----|-----------------------------------------------------------------------------------------------------------------------------------------------------------------------------------------------------------------------------------------------------------------------------------------------------------------------------------------------------------------------------------------------------------------------------------------------------------------------------------------------|---------|
| 1  | exp Anemia, Sickle Cell/                                                                                                                                                                                                                                                                                                                                                                                                                                                                      | 46344   |
| 2  | ((haemoglobin adj2 s) or (haemoglobin adj2 ss) or (hemoglobin adj2 SS) or (hemoglobin adj2 s) or (Hb adj2 SS) or (Hb adj2 S) or HbS or HbSS or sickle or "sickle cell" or sickling or SS or sickled or Drepanocyt* or meniscocyt*).mp.                                                                                                                                                                                                                                                        | 151414  |
| 3  | 1 or 2                                                                                                                                                                                                                                                                                                                                                                                                                                                                                        | 151538  |
| 4  | exp alpha-Thalassemia/                                                                                                                                                                                                                                                                                                                                                                                                                                                                        | 7157    |
| 5  | ((alpha adj2 (thalassemia* or thalassaemia*)) or alphathalassemia or alphathalassaemia or (hemoglobin adj2 H) or (haemoglobin adj2 H) or HbH or (A adj2 (thalassemia* or thalassaemia*)) or (alpha adj2 thal)).mp.                                                                                                                                                                                                                                                                            | 12540   |
| 6  | 4 or 5                                                                                                                                                                                                                                                                                                                                                                                                                                                                                        | 14534   |
| 7  | exp beta-Thalassemia/                                                                                                                                                                                                                                                                                                                                                                                                                                                                         | 18198   |
| 8  | ((b adj2 (thalassemia* or thalassaemia*)) or betathalassaemia or betathalassemia or bethathalassaemia or bethathalassemia or (Betha* adj2 (thalassemia* or thalassaemia*)) or (Beta* adj2 (thalassemia* or thalassaemia*)) or (betha adj thal) or (beta adj tal) or HbF or "Hb F" or (haemoglobin adj2 F) or (hemoglobin adj2 F) or ((thalassemia* or thalassaemia*) adj2 intermedia*) or ((thalassemia* or thalassaemia*) adj2 major*) or ((thalassemia* or thalassaemia*) adj2 minor*)).mp. | 38628   |
| 9  | 7 or 8                                                                                                                                                                                                                                                                                                                                                                                                                                                                                        | 38628   |
| 10 | (deltabeta or deltabetha or "delta betha" or "delta beta").mp.                                                                                                                                                                                                                                                                                                                                                                                                                                | 1599    |
| 11 | ((Hemoglobin or haemoglobin or Hb) adj2 lepore) or Hblepore or ((Hemoglobin or haemoglobin or Hb) adj2 Hollandia) or HbHollandia).mp.                                                                                                                                                                                                                                                                                                                                                         | 466     |
| 12 | ((Hemoglobin or haemoglobin or Hb) adj2 O) or HbO or ((Hemoglobin or haemoglobin or Hb) adj2 arab*) or HbArab).mp.                                                                                                                                                                                                                                                                                                                                                                            | 6229    |
| 13 | ((Hemoglobin or haemoglobin or Hb) adj2 D) or HbD or ((Hemoglobin or haemoglobin or Hb) adj2 Punjab) or HbPunjab or ((Hemoglobin or haemoglobin or Hb) adj2 "los angeles") or HbLosAngeles).mp.                                                                                                                                                                                                                                                                                               | 5946    |
| 14 | ("haemoglobin C" or "hemoglobin C" or "Hb C" or HbC or "haemoglobin E" or "hemoglobin E" or "Hb E" or HbE).mp.                                                                                                                                                                                                                                                                                                                                                                                | 23879   |
| 15 | 6 or 9 or 10 or 11 or 12 or 13 or 14                                                                                                                                                                                                                                                                                                                                                                                                                                                          | 78909   |
| 16 | 3 and 15                                                                                                                                                                                                                                                                                                                                                                                                                                                                                      | 17721   |

|    |                                                                                                                                                                                                                                                                                                                                                                                                                                                                                                                     |         |
|----|---------------------------------------------------------------------------------------------------------------------------------------------------------------------------------------------------------------------------------------------------------------------------------------------------------------------------------------------------------------------------------------------------------------------------------------------------------------------------------------------------------------------|---------|
| 17 | ((((Haemoglobin or hemoglobin or Hb) adj2 (SO or SSO or SD or SSD or Slepore or SSlepore)) or haemoglobinSO or hemoglobin SO or HbSO or HaemoglobinSSO or hemoglobinSSO or HbSSO or HaemoglobinSD or hemoglobinSD or HbSD or HaemoglobinSSD or hemoglobinSSD or HbSSD or HaemoglobinSlepore or hemoglobinSlepore or HbSlepore or HaemoglobinSSlepore or hemoglobinSSlepore or HbSSlepore or "haemoglobin SE" or "hemoglobin SE" or "Hb SE" or "HbSE" or "haemoglobin SC" or "hemoglobin SC" or "Hb SC" or HbSC).mp. | 4270    |
| 18 | ((("haemoglobin s" or "hemoglobin s" or "Hb S" or hbs or sickle or "sickle cell" or sickling or SS) adj2 (anaemia* or anemia* or disease* or disorder*)) or drepanocytomia* or meniscocyt* or "haemoglobin SS" or "hemoglobin SS" or "Hb SS" or HbSS).mp.                                                                                                                                                                                                                                                           | 52812   |
| 19 | 16 or 17 or 18                                                                                                                                                                                                                                                                                                                                                                                                                                                                                                      | 63394   |
| 20 | exp Ultrasonography, Doppler, Transcranial/                                                                                                                                                                                                                                                                                                                                                                                                                                                                         | 7424    |
| 21 | exp transcranial doppler/                                                                                                                                                                                                                                                                                                                                                                                                                                                                                           | 2604    |
| 22 | exp Brain/                                                                                                                                                                                                                                                                                                                                                                                                                                                                                                          | 2130110 |
| 23 | exp Head/                                                                                                                                                                                                                                                                                                                                                                                                                                                                                                           | 480633  |
| 24 | ((((transcranial or brain or cranial or head) and (sonograph* or ultrasonograph* or ecograph* or doppler or echogram* or echosound* or sonogram* or sonograph* or ultrasonic or ultrasound)) or neurosonolog*).mp.                                                                                                                                                                                                                                                                                                  | 99666   |
| 25 | 20 or 21 or 22 or 23 or 24                                                                                                                                                                                                                                                                                                                                                                                                                                                                                          | 2639879 |
| 26 | 19 and 25                                                                                                                                                                                                                                                                                                                                                                                                                                                                                                           | 2249    |
| 27 | exp Afghanistan/                                                                                                                                                                                                                                                                                                                                                                                                                                                                                                    | 7388    |
| 28 | exp Benin/                                                                                                                                                                                                                                                                                                                                                                                                                                                                                                          | 3137    |
| 29 | exp Burkina Faso/                                                                                                                                                                                                                                                                                                                                                                                                                                                                                                   | 5915    |
| 30 | exp Burundi/                                                                                                                                                                                                                                                                                                                                                                                                                                                                                                        | 1200    |
| 31 | exp Central African Republic/                                                                                                                                                                                                                                                                                                                                                                                                                                                                                       | 1340    |
| 32 | exp Chad/                                                                                                                                                                                                                                                                                                                                                                                                                                                                                                           | 1212    |
| 33 | exp Comoros/                                                                                                                                                                                                                                                                                                                                                                                                                                                                                                        | 529     |
| 34 | exp Congo/                                                                                                                                                                                                                                                                                                                                                                                                                                                                                                          | 4219    |
| 35 | exp Eritrea/                                                                                                                                                                                                                                                                                                                                                                                                                                                                                                        | 637     |
| 36 | exp Ethiopia/                                                                                                                                                                                                                                                                                                                                                                                                                                                                                                       | 19949   |
| 37 | exp Gambia/                                                                                                                                                                                                                                                                                                                                                                                                                                                                                                         | 4511    |
| 38 | exp Guinea/                                                                                                                                                                                                                                                                                                                                                                                                                                                                                                         | 2284    |

|    |                                                                                                                                                                                                                                                                                                                                                                                                                                                                                                                                                                                                                                                                                                                                                                                                                                                                                                                                                                                                                                                                                                           |        |
|----|-----------------------------------------------------------------------------------------------------------------------------------------------------------------------------------------------------------------------------------------------------------------------------------------------------------------------------------------------------------------------------------------------------------------------------------------------------------------------------------------------------------------------------------------------------------------------------------------------------------------------------------------------------------------------------------------------------------------------------------------------------------------------------------------------------------------------------------------------------------------------------------------------------------------------------------------------------------------------------------------------------------------------------------------------------------------------------------------------------------|--------|
| 39 | exp Guinea-Bissau/                                                                                                                                                                                                                                                                                                                                                                                                                                                                                                                                                                                                                                                                                                                                                                                                                                                                                                                                                                                                                                                                                        | 1645   |
| 40 | exp Haiti/                                                                                                                                                                                                                                                                                                                                                                                                                                                                                                                                                                                                                                                                                                                                                                                                                                                                                                                                                                                                                                                                                                | 5852   |
| 41 | exp North Korea/                                                                                                                                                                                                                                                                                                                                                                                                                                                                                                                                                                                                                                                                                                                                                                                                                                                                                                                                                                                                                                                                                          | 570    |
| 42 | exp "Democratic People's Republic of Korea"/                                                                                                                                                                                                                                                                                                                                                                                                                                                                                                                                                                                                                                                                                                                                                                                                                                                                                                                                                                                                                                                              | 570    |
| 43 | exp Liberia/                                                                                                                                                                                                                                                                                                                                                                                                                                                                                                                                                                                                                                                                                                                                                                                                                                                                                                                                                                                                                                                                                              | 2109   |
| 44 | exp Madagascar/                                                                                                                                                                                                                                                                                                                                                                                                                                                                                                                                                                                                                                                                                                                                                                                                                                                                                                                                                                                                                                                                                           | 6187   |
| 45 | exp Malawi/                                                                                                                                                                                                                                                                                                                                                                                                                                                                                                                                                                                                                                                                                                                                                                                                                                                                                                                                                                                                                                                                                               | 9540   |
| 46 | exp Mali/                                                                                                                                                                                                                                                                                                                                                                                                                                                                                                                                                                                                                                                                                                                                                                                                                                                                                                                                                                                                                                                                                                 | 4635   |
| 47 | exp Mozambique/                                                                                                                                                                                                                                                                                                                                                                                                                                                                                                                                                                                                                                                                                                                                                                                                                                                                                                                                                                                                                                                                                           | 4513   |
| 48 | exp Nepal/                                                                                                                                                                                                                                                                                                                                                                                                                                                                                                                                                                                                                                                                                                                                                                                                                                                                                                                                                                                                                                                                                                | 14839  |
| 49 | exp Niger/                                                                                                                                                                                                                                                                                                                                                                                                                                                                                                                                                                                                                                                                                                                                                                                                                                                                                                                                                                                                                                                                                                | 2607   |
| 50 | exp Rwanda/                                                                                                                                                                                                                                                                                                                                                                                                                                                                                                                                                                                                                                                                                                                                                                                                                                                                                                                                                                                                                                                                                               | 4388   |
| 51 | exp Senegal/                                                                                                                                                                                                                                                                                                                                                                                                                                                                                                                                                                                                                                                                                                                                                                                                                                                                                                                                                                                                                                                                                              | 9913   |
| 52 | exp Sierra Leone/                                                                                                                                                                                                                                                                                                                                                                                                                                                                                                                                                                                                                                                                                                                                                                                                                                                                                                                                                                                                                                                                                         | 2833   |
| 53 | exp Somalia/                                                                                                                                                                                                                                                                                                                                                                                                                                                                                                                                                                                                                                                                                                                                                                                                                                                                                                                                                                                                                                                                                              | 2832   |
| 54 | exp South Sudan/                                                                                                                                                                                                                                                                                                                                                                                                                                                                                                                                                                                                                                                                                                                                                                                                                                                                                                                                                                                                                                                                                          | 144    |
| 55 | exp Tanzania/                                                                                                                                                                                                                                                                                                                                                                                                                                                                                                                                                                                                                                                                                                                                                                                                                                                                                                                                                                                                                                                                                             | 20657  |
| 56 | exp Togo/                                                                                                                                                                                                                                                                                                                                                                                                                                                                                                                                                                                                                                                                                                                                                                                                                                                                                                                                                                                                                                                                                                 | 1999   |
| 57 | exp Uganda/                                                                                                                                                                                                                                                                                                                                                                                                                                                                                                                                                                                                                                                                                                                                                                                                                                                                                                                                                                                                                                                                                               | 22017  |
| 58 | exp Zimbabwe/                                                                                                                                                                                                                                                                                                                                                                                                                                                                                                                                                                                                                                                                                                                                                                                                                                                                                                                                                                                                                                                                                             | 10106  |
| 59 | (Afghanistan or Kabul or Benin or dahomey or "porto novo" or hogbonu or ajashe or "Burkina faso" or "Burkina fasso" or "upper volta" or uagadugu or Burundi or urundi or Bujumbura or "Central African republic " or "Ubangi shari " or "centrafrican republic " or centrafricque or Bangui or Chad or tchad or Ndjamena or "n djamena" or "ndjamena" or Comoros or "Comoro island*" or "iles comores " or Mayotte or moronic or Congo* or Brazzaville or Eritrea or asmara or Ethiopia* or "addis ababa" or Gambia* or Banjul or Guinea* or Conakry or guinee or "Guinea bissau " or guinea or Bissau or guine or Haiti* or "port au prince" or "North korea*" or (democratic and people* and republic and korea) or Pyongyang or Liberia or Monrovia or Madagascar* or malasgasy or Antananarivo or Malaw* or Nyasaland or Lilongwe or Mali or Bamako or Mozambique* or (Portuguese and east and Africa) or mocambique or Maputo or Nepal* or Kathmandu or Niger* or Niamey or Rwand* or Ruand* or Kigali or Senegal* or Dakar or Sierra Leone or Freetown or Somalia or Mogadishu or "South sudan*" or | 581612 |

|    |                                                                                                                                                          |        |
|----|----------------------------------------------------------------------------------------------------------------------------------------------------------|--------|
|    | jubatan or juba or Tanzan* or Tanganyika or Zanzibar or Dodoma or Togo* or togelese or lome or Ugand* or Kampala or Zimbabwe* or Rhodesia or Harare).mp. |        |
| 60 | exp Angola/                                                                                                                                              | 1824   |
| 61 | exp Armenia/                                                                                                                                             | 2456   |
| 62 | exp Bangladesh/                                                                                                                                          | 20705  |
| 63 | exp Bhutan/                                                                                                                                              | 803    |
| 64 | exp Bolivia/                                                                                                                                             | 4900   |
| 65 | exp Cambodia/                                                                                                                                            | 6604   |
| 66 | exp Cote d'Ivoire/                                                                                                                                       | 5195   |
| 67 | exp Djibouti/                                                                                                                                            | 469    |
| 68 | exp Egypt/                                                                                                                                               | 28269  |
| 69 | exp El Salvador/                                                                                                                                         | 2052   |
| 70 | exp "Georgia (Republic)"/                                                                                                                                | 2704   |
| 71 | exp Ghana/                                                                                                                                               | 14335  |
| 72 | exp Guatemala/                                                                                                                                           | 5528   |
| 73 | exp Honduras/                                                                                                                                            | 2304   |
| 74 | exp India/                                                                                                                                               | 198521 |
| 75 | exp Indonesia/                                                                                                                                           | 19997  |
| 76 | exp Kenya/                                                                                                                                               | 28573  |
| 77 | exp Kiribati/                                                                                                                                            | 1919   |
| 78 | exp Micronesia/                                                                                                                                          | 2505   |
| 79 | exp Kosovo/                                                                                                                                              | 388    |
| 80 | exp Kyrgyzstan/                                                                                                                                          | 1895   |
| 81 | exp Laos/                                                                                                                                                | 3227   |
| 82 | exp Lesotho/                                                                                                                                             | 831    |
| 83 | exp Mauritania/                                                                                                                                          | 849    |
| 84 | exp "Federated States of Micronesia"/                                                                                                                    | 655    |
| 85 | exp Moldova/                                                                                                                                             | 1357   |
| 86 | exp Mongolia/                                                                                                                                            | 3854   |
| 87 | exp Morocco/                                                                                                                                             | 10436  |
| 88 | exp Myanmar/                                                                                                                                             | 4152   |
| 89 | exp Nicaragua/                                                                                                                                           | 2978   |



|     |                                                                                                                                                                                                                                                                                                                                                                                                                                                                                                                                                                                                                                                                                                                                                                                                                                                                                                                                                                                                                                                                |        |
|-----|----------------------------------------------------------------------------------------------------------------------------------------------------------------------------------------------------------------------------------------------------------------------------------------------------------------------------------------------------------------------------------------------------------------------------------------------------------------------------------------------------------------------------------------------------------------------------------------------------------------------------------------------------------------------------------------------------------------------------------------------------------------------------------------------------------------------------------------------------------------------------------------------------------------------------------------------------------------------------------------------------------------------------------------------------------------|--------|
| 90  | exp Nigeria/                                                                                                                                                                                                                                                                                                                                                                                                                                                                                                                                                                                                                                                                                                                                                                                                                                                                                                                                                                                                                                                   | 53469  |
| 91  | exp Pakistan/                                                                                                                                                                                                                                                                                                                                                                                                                                                                                                                                                                                                                                                                                                                                                                                                                                                                                                                                                                                                                                                  | 34782  |
| 92  | exp Papua New Guinea/                                                                                                                                                                                                                                                                                                                                                                                                                                                                                                                                                                                                                                                                                                                                                                                                                                                                                                                                                                                                                                          | 7089   |
| 93  | exp Solomon Islands/                                                                                                                                                                                                                                                                                                                                                                                                                                                                                                                                                                                                                                                                                                                                                                                                                                                                                                                                                                                                                                           | 6188   |
| 94  | exp Melanesia/                                                                                                                                                                                                                                                                                                                                                                                                                                                                                                                                                                                                                                                                                                                                                                                                                                                                                                                                                                                                                                                 | 6376   |
| 95  | exp Sri Lanka/                                                                                                                                                                                                                                                                                                                                                                                                                                                                                                                                                                                                                                                                                                                                                                                                                                                                                                                                                                                                                                                 | 11022  |
| 96  | exp Sudan/                                                                                                                                                                                                                                                                                                                                                                                                                                                                                                                                                                                                                                                                                                                                                                                                                                                                                                                                                                                                                                                     | 8912   |
| 97  | exp Swaziland/                                                                                                                                                                                                                                                                                                                                                                                                                                                                                                                                                                                                                                                                                                                                                                                                                                                                                                                                                                                                                                                 | 1121   |
| 98  | exp Syrian Arab Republic/                                                                                                                                                                                                                                                                                                                                                                                                                                                                                                                                                                                                                                                                                                                                                                                                                                                                                                                                                                                                                                      | 1726   |
| 99  | exp Syria/                                                                                                                                                                                                                                                                                                                                                                                                                                                                                                                                                                                                                                                                                                                                                                                                                                                                                                                                                                                                                                                     | 3060   |
| 100 | exp Tajikistan/                                                                                                                                                                                                                                                                                                                                                                                                                                                                                                                                                                                                                                                                                                                                                                                                                                                                                                                                                                                                                                                | 1246   |
| 101 | exp Timor-Leste/                                                                                                                                                                                                                                                                                                                                                                                                                                                                                                                                                                                                                                                                                                                                                                                                                                                                                                                                                                                                                                               | 525    |
| 102 | exp Tunisia/                                                                                                                                                                                                                                                                                                                                                                                                                                                                                                                                                                                                                                                                                                                                                                                                                                                                                                                                                                                                                                                   | 14711  |
| 103 | exp Ukraine/                                                                                                                                                                                                                                                                                                                                                                                                                                                                                                                                                                                                                                                                                                                                                                                                                                                                                                                                                                                                                                                   | 23944  |
| 104 | exp Uzbekistan/                                                                                                                                                                                                                                                                                                                                                                                                                                                                                                                                                                                                                                                                                                                                                                                                                                                                                                                                                                                                                                                | 2998   |
| 105 | exp Vanuatu/                                                                                                                                                                                                                                                                                                                                                                                                                                                                                                                                                                                                                                                                                                                                                                                                                                                                                                                                                                                                                                                   | 650    |
| 106 | exp Viet Nam/                                                                                                                                                                                                                                                                                                                                                                                                                                                                                                                                                                                                                                                                                                                                                                                                                                                                                                                                                                                                                                                  | 21480  |
| 107 | exp Palestine/                                                                                                                                                                                                                                                                                                                                                                                                                                                                                                                                                                                                                                                                                                                                                                                                                                                                                                                                                                                                                                                 | 1200   |
| 108 | exp Middle East/                                                                                                                                                                                                                                                                                                                                                                                                                                                                                                                                                                                                                                                                                                                                                                                                                                                                                                                                                                                                                                               | 252831 |
| 109 | exp Yemen/                                                                                                                                                                                                                                                                                                                                                                                                                                                                                                                                                                                                                                                                                                                                                                                                                                                                                                                                                                                                                                                     | 2673   |
| 110 | exp Zambia/                                                                                                                                                                                                                                                                                                                                                                                                                                                                                                                                                                                                                                                                                                                                                                                                                                                                                                                                                                                                                                                    | 8183   |
| 111 | (Angol* or Luanda or Armenia* or Yerevan or Bangladesh* or "east Pakistan" or Dhaka or Bhutan* or thimphu or Bolivia* or sucre or "la paz" or "cabo verd*" or praia or Cambodia* or "phnom penh" or Kampuchea or (khmer adj2 republic*) or kampudja or "cote d'Ivoire" or "ivory coast" or Yamoussoukro or Ivorian or Djibouti or ("afar and issa" adj2 land) or "French sudan" or "French adj somaliland" or Egypt* or "united arab republic" or cairo or "El Salvador" or Salvador* or "san salvador" or Georgia* or Tiflis or Ghana* or "gold coast" or Accra or Guatemala* or Hondura* or Tegucigalpa or India* or "New delhi" or Indonesia* or Jakarta or Celebes or "East indies" or "Irian jaya" or java or madoera or Madura or "malay archipelago" or "Netherlands east indies" or ("new guinea" adj west) or Sulawesi or Sumatra or timor or "west irian" or Kenya* or Nairobi or Kiribati or Tarawa or Micronesia* or Palikir or "caroline island*" or "ellice island*" or "gilbert island*" or "Johnston island*" or "mariana island*" or Nauru or | 911285 |

|     |                                                                                                                                                                                                                                                                                                                                                                                                                                                                                                                                                                                                                                                                                                                                                                                                                                                                                                                                                                                                                                                                                                                                                                              |         |
|-----|------------------------------------------------------------------------------------------------------------------------------------------------------------------------------------------------------------------------------------------------------------------------------------------------------------------------------------------------------------------------------------------------------------------------------------------------------------------------------------------------------------------------------------------------------------------------------------------------------------------------------------------------------------------------------------------------------------------------------------------------------------------------------------------------------------------------------------------------------------------------------------------------------------------------------------------------------------------------------------------------------------------------------------------------------------------------------------------------------------------------------------------------------------------------------|---------|
|     | "pacific island*" or Tuvalu or Kosov* or Pristina or Kirghiz* or Kyrgyz* or Bishkek or Lao or Laos or Laotian or Vientiane or Lesotho or Basutoland or Basotho or Maseru or (Lesotho adj kingdom) or Mauritania* or Nouakchott or Mauretania or Moldova* or Moldova* or Chisinau or Moldavia* or Mongolia* or Ulaanbaatar or Morocco or Ifni or Rabat or Moroccan or Myanma* or Burma or Naypyidaw or Burmese or Nicaragua* or Managua or Abuja or Pakistan* or Islamabad or Papua or "New guinea*" or ("New guinea" adj east) or "Port moresby" or "Sao tome and Principe" or "Sao Tome*" or "Solomon Island*" or Melanesia* or "Norfolk island*" or "Sri Lanka*" or Ceylon or "Sri Jayawardenepura Kotte" or Sudan* or Khartoum or Swaziland or Mbabane or Swazi or Syria* or Damascus or Tajikistan or Tadjikistan or TadzhiK or TadzhiKistan or Tajik or Dushanbe or Timor* or Dili or Tunisia* or Tunis or tunesia or Ukraine or Ukraina* or Kiev or Uzbekistan* or Uzbek or Tashkent or Vanuatu or "New Hebrides" or "Port Vila" or "Viet Nam" or Vietnam* or Hanoi or Palestin* or "West Bank" or "Middle East" or Yemen*n or Aden or Sanaa or Zambia* or Lusaka).mp. |         |
| 112 | exp "South and Central America"/                                                                                                                                                                                                                                                                                                                                                                                                                                                                                                                                                                                                                                                                                                                                                                                                                                                                                                                                                                                                                                                                                                                                             | 168878  |
| 113 | exp Latin America/                                                                                                                                                                                                                                                                                                                                                                                                                                                                                                                                                                                                                                                                                                                                                                                                                                                                                                                                                                                                                                                                                                                                                           | 178792  |
| 114 | ((latin or south or central) adj America*).mp.                                                                                                                                                                                                                                                                                                                                                                                                                                                                                                                                                                                                                                                                                                                                                                                                                                                                                                                                                                                                                                                                                                                               | 101128  |
| 115 | exp low income country/                                                                                                                                                                                                                                                                                                                                                                                                                                                                                                                                                                                                                                                                                                                                                                                                                                                                                                                                                                                                                                                                                                                                                      | 1223    |
| 116 | exp Developing Countries/                                                                                                                                                                                                                                                                                                                                                                                                                                                                                                                                                                                                                                                                                                                                                                                                                                                                                                                                                                                                                                                                                                                                                    | 142230  |
| 117 | (("Low income" or "Lower middle income") adj (economy or country or countries)).mp.                                                                                                                                                                                                                                                                                                                                                                                                                                                                                                                                                                                                                                                                                                                                                                                                                                                                                                                                                                                                                                                                                          | 12147   |
| 118 | exp developing country/                                                                                                                                                                                                                                                                                                                                                                                                                                                                                                                                                                                                                                                                                                                                                                                                                                                                                                                                                                                                                                                                                                                                                      | 142230  |
| 119 | exp South Asia/ or exp Asia/ or exp Southeast Asia/                                                                                                                                                                                                                                                                                                                                                                                                                                                                                                                                                                                                                                                                                                                                                                                                                                                                                                                                                                                                                                                                                                                          | 1468844 |
| 120 | exp South Africa/ or exp Africa/ or exp North Africa/ or exp Central Africa/                                                                                                                                                                                                                                                                                                                                                                                                                                                                                                                                                                                                                                                                                                                                                                                                                                                                                                                                                                                                                                                                                                 | 475241  |
| 121 | exp Asia, Northern/ or exp Asia, Central/ or exp Asia, Western/ or exp Asia, Southeastern/                                                                                                                                                                                                                                                                                                                                                                                                                                                                                                                                                                                                                                                                                                                                                                                                                                                                                                                                                                                                                                                                                   | 1137800 |
| 122 | exp Africa, Western/ or exp Africa, Northern/ or exp Africa, Eastern/ or exp "Africa South of the Sahara"/ or exp Africa, Southern/                                                                                                                                                                                                                                                                                                                                                                                                                                                                                                                                                                                                                                                                                                                                                                                                                                                                                                                                                                                                                                          | 453676  |
| 123 | exp Europe, Eastern/ or exp Europe/                                                                                                                                                                                                                                                                                                                                                                                                                                                                                                                                                                                                                                                                                                                                                                                                                                                                                                                                                                                                                                                                                                                                          | 2488395 |
| 124 | (europe or asia or africa).mp.                                                                                                                                                                                                                                                                                                                                                                                                                                                                                                                                                                                                                                                                                                                                                                                                                                                                                                                                                                                                                                                                                                                                               | 732169  |
| 125 | 27 or 28 or 29 or 30 or 31 or 32 or 33 or 34 or 35 or 36 or 37 or 38 or 39 or 40 or 41 or 42 or 43 or 44 or 45 or 46 or 47 or 48 or 49 or 50 or 51 or 52 or 53 or 54 or 55 or 56 or 57 or 58 or 59 or 60 or 61 or 62 or 63 or 64 or 65 or 66 or 67 or 68 or 69 or 70 or 71 or 72 or 73 or 74 or 75 or 76 or 77 or 78 or 79 or 80 or 81 or 82 or 83 or 84 or 85 or 86 or 87 or 88 or 89 or 90 or 91 or 92 or 93 or 94 or 95 or 96 or 97 or 98 or 99 or 100 or 101                                                                                                                                                                                                                                                                                                                                                                                                                                                                                                                                                                                                                                                                                                             | 5342423 |

|     |                                                                                                                                                                  |     |
|-----|------------------------------------------------------------------------------------------------------------------------------------------------------------------|-----|
|     | or 102 or 103 or 104 or 105 or 106 or 107 or 108 or 109 or 110 or 111 or 112 or 113 or 114 or 115 or 116 or 117 or 118 or 119 or 120 or 121 or 122 or 123 or 124 |     |
| 126 | 26 and 125                                                                                                                                                       | 286 |
| 127 | remove duplicates from 126                                                                                                                                       | 242 |

4. Database(s): **Embase** 1988 to 2017 Week 30, Ovid MEDLINE(R) 1946 to Present and Epub Ahead of Print, In-Process & Other Non-Indexed Citations and Ovid MEDLINE(R) Daily

| #  | Searches                                                                                                                                                                                                                                                                                                                                                                                                                                                                                        | Results |
|----|-------------------------------------------------------------------------------------------------------------------------------------------------------------------------------------------------------------------------------------------------------------------------------------------------------------------------------------------------------------------------------------------------------------------------------------------------------------------------------------------------|---------|
| 1  | exp Anemia, Sickle Cell/                                                                                                                                                                                                                                                                                                                                                                                                                                                                        | 46344   |
| 2  | ((haemoglobin adj2 s) or (haemoglobin adj2 ss) or (hemoglobin adj2 SS) or (hemoglobin adj2 s) or (Hb adj2 SS) or (Hb adj2 S) or HbS or HbSS or sickle or "sickle cell" or sickling or SS or sickled or Drepanocyt* or meniscocyt*).mp.                                                                                                                                                                                                                                                          | 151414  |
| 3  | 1 or 2                                                                                                                                                                                                                                                                                                                                                                                                                                                                                          | 151538  |
| 4  | exp alpha-Thalassemia/                                                                                                                                                                                                                                                                                                                                                                                                                                                                          | 7157    |
| 5  | ((alpha adj2 (thalassemia* or thalassaemia*)) or alphathalassemia or alphathalassaemia or (hemoglobin adj2 H) or (haemoglobin adj2 H) or HbH or (A adj2 (thalassemia* or thalassaemia*)) or (alpha adj2 thal)).mp.                                                                                                                                                                                                                                                                              | 12540   |
| 6  | 4 or 5                                                                                                                                                                                                                                                                                                                                                                                                                                                                                          | 14534   |
| 7  | exp beta-Thalassemia/                                                                                                                                                                                                                                                                                                                                                                                                                                                                           | 18198   |
| 8  | ((b adj2 (thalassemia* or thalassaemia*)) or betathalassaemia or betathalassemia or bethathalassaemia or bethathalassemia or (Betha* adj2 (thalassemia* or thalassaemia*)) or (Beta* adj2 (thalassemia* or thalassaemia*)) or (betha adj2 thal) or (beta adj2 tal) or HbF or "Hb F" or (haemoglobin adj2 F) or (hemoglobin adj2 F) or ((thalassemia* or thalassaemia*) adj2 intermedia*) or ((thalassemia* or thalassaemia*) adj2 major*) or ((thalassemia* or thalassaemia*) adj2 minor*)).mp. | 38628   |
| 9  | 7 or 8                                                                                                                                                                                                                                                                                                                                                                                                                                                                                          | 38628   |
| 10 | (deltabeta or deltabetha or "delta betha" or "delta beta").mp.                                                                                                                                                                                                                                                                                                                                                                                                                                  | 1599    |
| 11 | ((Hemoglobin or haemoglobin or Hb) adj2 lepore) or Hblepore or ((Hemoglobin or haemoglobin or Hb) adj2 Hollandia) or HbHollandia).mp.                                                                                                                                                                                                                                                                                                                                                           | 466     |
| 12 | ((Hemoglobin or haemoglobin or Hb) adj2 O) or HbO or ((Hemoglobin or haemoglobin or Hb) adj2 arab*) or HbArab).mp.                                                                                                                                                                                                                                                                                                                                                                              | 6229    |

|    |                                                                                                                                                                                                                                                                                                                                                                                                                                                                                                                     |        |
|----|---------------------------------------------------------------------------------------------------------------------------------------------------------------------------------------------------------------------------------------------------------------------------------------------------------------------------------------------------------------------------------------------------------------------------------------------------------------------------------------------------------------------|--------|
| 13 | ((((Hemoglobin or haemoglobin or Hb) adj2 D) or HbD or ((Hemoglobin or haemoglobin or Hb) adj2 Punjab) or HbPunjab or ((Hemoglobin or haemoglobin or Hb) adj2 "los angeles") or HbLosAngeles).mp.                                                                                                                                                                                                                                                                                                                   | 5946   |
| 14 | ("haemoglobin C" or "hemoglobin C" or "Hb C" or HbC or "haemoglobin E" or "hemoglobin E" or "Hb E" or HbE).mp.                                                                                                                                                                                                                                                                                                                                                                                                      | 23879  |
| 15 | 6 or 9 or 10 or 11 or 12 or 13 or 14                                                                                                                                                                                                                                                                                                                                                                                                                                                                                | 78909  |
| 16 | 3 and 15                                                                                                                                                                                                                                                                                                                                                                                                                                                                                                            | 17721  |
| 17 | ((((Haemoglobin or hemoglobin or Hb) adj2 (SO or SSO or SD or SSD or Slepore or SSlepore)) or haemoglobinSO or hemoglobin SO or HbSO or HaemoglobinSSO or hemoglobinSSO or HbSSO or HaemoglobinSD or hemoglobinSD or HbSD or HaemoglobinSSD or hemoglobinSSD or HbSSD or HaemoglobinSlepore or hemoglobinSlepore or HbSlepore or HaemoglobinSSlepore or hemoglobinSSlepore or HbSSlepore or "haemoglobin SE" or "hemoglobin SE" or "Hb SE" or "HbSE" or "haemoglobin SC" or "hemoglobin SC" or "Hb SC" or HbSC).mp. | 4270   |
| 18 | ((("haemoglobin s" or "hemoglobin s" or "Hb S" or hbs or sickle or "sickle cell" or sickling or SS) adj2 (anaemia* or anemia* or disease* or disorder*)) or drepanocytomia* or meniscocyt* or "haemoglobin SS" or "hemoglobin SS" or "Hb SS" or HbSS).mp.                                                                                                                                                                                                                                                           | 52812  |
| 19 | 16 or 17 or 18                                                                                                                                                                                                                                                                                                                                                                                                                                                                                                      | 63394  |
| 20 | exp Stroke/                                                                                                                                                                                                                                                                                                                                                                                                                                                                                                         | 259706 |
| 21 | exp cerebrovascular accident/                                                                                                                                                                                                                                                                                                                                                                                                                                                                                       | 259706 |
| 22 | (stroke* or "cerebrovascular accident*" or ((cerebrovascular or cerebral or cerebrum) adj2 (apoplexy or apoplexia or apoplectic)) or CVA or CVAS or ((brain or cerebrum or head or cranial or cerebral or cerebrovascular) adj2 (insult* or injur* or insufficienc* or failure* or ischaemic or ischemic or "vascular event*" or "vascular accident*" or "blood flow disturbance*" or "blood flow disorder*")) or ((ischemic or ischaemic) adj2 (attack* or seizure*))).mp.                                         | 910401 |
| 23 | 20 or 21 or 22                                                                                                                                                                                                                                                                                                                                                                                                                                                                                                      | 926623 |
| 24 | exp Blood Transfusion/ or exp Blood Component Transfusion/ or exp Transfusion Medicine/ or exp Blood Transfusion, Autologous/                                                                                                                                                                                                                                                                                                                                                                                       | 224415 |
| 25 | exp transfusion/ or exp exchange blood transfusion/ or exp erythrocyte transfusion/                                                                                                                                                                                                                                                                                                                                                                                                                                 | 249016 |
| 26 | ((((blood or erythrocyte* or normocyte*) adj3 (transfusion* or exchange or infusion or replacement or retransfusion)) or hemotherapy or haemotherapy or multitransfusion                                                                                                                                                                                                                                                                                                                                            | 252201 |

|    |                                                                                                                                                                                                                                                          |          |
|----|----------------------------------------------------------------------------------------------------------------------------------------------------------------------------------------------------------------------------------------------------------|----------|
|    | or retransfusion or (transfusion adj2 (therapy or therapeutic* or exchange or replacement)) or exsanguinatio transfusion).mp.                                                                                                                            |          |
| 27 | 24 or 25 or 26                                                                                                                                                                                                                                           | 386349   |
| 28 | exp evidence based medicine/                                                                                                                                                                                                                             | 1053589  |
| 29 | exp Meta-Analysis as Topic/                                                                                                                                                                                                                              | 52304    |
| 30 | exp meta analysis/                                                                                                                                                                                                                                       | 214090   |
| 31 | exp "systematic review"/                                                                                                                                                                                                                                 | 144175   |
| 32 | exp Guideline/ or exp Practice Guideline/                                                                                                                                                                                                                | 448026   |
| 33 | exp controlled study/                                                                                                                                                                                                                                    | 5811944  |
| 34 | exp Randomized Controlled Trial/                                                                                                                                                                                                                         | 915994   |
| 35 | exp triple blind procedure/                                                                                                                                                                                                                              | 166      |
| 36 | exp Double-Blind Method/                                                                                                                                                                                                                                 | 280263   |
| 37 | exp Single-Blind Method/                                                                                                                                                                                                                                 | 53493    |
| 38 | exp latin square design/                                                                                                                                                                                                                                 | 338      |
| 39 | exp Placebos/                                                                                                                                                                                                                                            | 300518   |
| 40 | exp Placebo Effect/                                                                                                                                                                                                                                      | 8693     |
| 41 | exp comparative study/                                                                                                                                                                                                                                   | 2776471  |
| 42 | exp intervention studies/                                                                                                                                                                                                                                | 33498    |
| 43 | exp Cross-Sectional Studies/                                                                                                                                                                                                                             | 476748   |
| 44 | exp Cross-Over Studies/                                                                                                                                                                                                                                  | 95187    |
| 45 | exp Cohort Studies/                                                                                                                                                                                                                                      | 2022204  |
| 46 | exp longitudinal study/                                                                                                                                                                                                                                  | 213380   |
| 47 | exp retrospective study/                                                                                                                                                                                                                                 | 1211528  |
| 48 | exp prospective study/                                                                                                                                                                                                                                   | 852329   |
| 49 | exp clinical trial/                                                                                                                                                                                                                                      | 1991860  |
| 50 | clinical study/                                                                                                                                                                                                                                          | 105905   |
| 51 | exp case-control studies/                                                                                                                                                                                                                                | 1024912  |
| 52 | exp confidence interval/                                                                                                                                                                                                                                 | 161103   |
| 53 | exp multivariate analysis/                                                                                                                                                                                                                               | 447822   |
| 54 | ((evidence adj based) or (meta adj analys*) or (systematic* adj3 review*) or guideline* or (control* adj3 study) or (control* adj3 trial) or (randomized adj3 study) or (randomized adj3 trial) or (randomised adj3 study) or (randomised adj3 trial) or | 17659596 |

|    |                                                                                                                                                                                                                                                                                                                                                                                                                                                                                                                                                                                                                                                                                                                                                                                                                                                                                                                                                                                                                                                                                                                                                                                                                                                                                                                                                                                                                                                                                                                                                                |          |
|----|----------------------------------------------------------------------------------------------------------------------------------------------------------------------------------------------------------------------------------------------------------------------------------------------------------------------------------------------------------------------------------------------------------------------------------------------------------------------------------------------------------------------------------------------------------------------------------------------------------------------------------------------------------------------------------------------------------------------------------------------------------------------------------------------------------------------------------------------------------------------------------------------------------------------------------------------------------------------------------------------------------------------------------------------------------------------------------------------------------------------------------------------------------------------------------------------------------------------------------------------------------------------------------------------------------------------------------------------------------------------------------------------------------------------------------------------------------------------------------------------------------------------------------------------------------------|----------|
|    | "pragmatic clinical trial" or (doubl* adj blind*) or (doubl* adj mask*) or (singl* adj blind*) or (singl* adj mask*) or (tripl* adj blind*) or (tripl* adj mask*) or (trebl* adj blind*) or (trebl* adj mask*) or "latin square" or placebo* or nocebo* or multivariate or "comparative study" or "comparative survey" or "comparative analysis" or (intervention* adj2 study) or (intervention* adj2 trial) or "cross-sectional study" or "cross-sectional analysis" or "cross-sectional survey" or "cross-sectional design" or "prevalence study" or "prevalence analysis" or "prevalence survey" or "disease frequency study" or "disease frequency analysis" or "disease frequency survey" or crossover or "cross-over" or cohort* or "longitudinal study" or "longitudinal survey" or "longitudinal analysis" or "longitudinal evaluation" or longitudinal* or ((retrospective or "ex post facto") adj3 (study or survey or analysis or design)) or retrospectiv* or "prospective study" or "prospective survey" or "prospective analysis" or prospectiv* or "concurrent study" or "concurrent survey" or "concurrent analysis" or "clinical study" or "clinical trial" or "case control study" or "case base study" or "case referent study" or "case referent study" or "case referent study" or "case compeer study" or "case comparison study" or "matched case control" or "multicenter study" or "multi-center study" or "odds ratio" or "confidence interval" or "change analysis" or ((study or trial or random* or control*) and compar*).mp,pt. |          |
| 55 | 28 or 29 or 30 or 31 or 32 or 33 or 34 or 35 or 36 or 37 or 38 or 39 or 40 or 41 or 42 or 43 or 44 or 45 or 46 or 47 or 48 or 49 or 50 or 51 or 52 or 53 or 54                                                                                                                                                                                                                                                                                                                                                                                                                                                                                                                                                                                                                                                                                                                                                                                                                                                                                                                                                                                                                                                                                                                                                                                                                                                                                                                                                                                                 | 18150067 |
| 56 | 19 and 23 and 27 and 55                                                                                                                                                                                                                                                                                                                                                                                                                                                                                                                                                                                                                                                                                                                                                                                                                                                                                                                                                                                                                                                                                                                                                                                                                                                                                                                                                                                                                                                                                                                                        | 1063     |
| 57 | limit 56 to yr="2010 -Current"                                                                                                                                                                                                                                                                                                                                                                                                                                                                                                                                                                                                                                                                                                                                                                                                                                                                                                                                                                                                                                                                                                                                                                                                                                                                                                                                                                                                                                                                                                                                 | 707      |
| 58 | remove duplicates from 57                                                                                                                                                                                                                                                                                                                                                                                                                                                                                                                                                                                                                                                                                                                                                                                                                                                                                                                                                                                                                                                                                                                                                                                                                                                                                                                                                                                                                                                                                                                                      | 577      |
| 59 | limit 58 to (editorial or erratum or letter or note or addresses or autobiography or bibliography or biography or blogs or comment or dictionary or directory or interactive tutorial or interview or lectures or legal cases or legislation or news or newspaper article or overall or patient education handout or periodical index or portraits or published erratum or video-audio media or webcasts) [Limit not valid in Embase,Ovid MEDLINE(R),Ovid MEDLINE(R) Daily Update,Ovid MEDLINE(R) In-Process,Ovid MEDLINE(R) Publisher; records were retained]                                                                                                                                                                                                                                                                                                                                                                                                                                                                                                                                                                                                                                                                                                                                                                                                                                                                                                                                                                                                 | 16       |
| 60 | 58 not 59                                                                                                                                                                                                                                                                                                                                                                                                                                                                                                                                                                                                                                                                                                                                                                                                                                                                                                                                                                                                                                                                                                                                                                                                                                                                                                                                                                                                                                                                                                                                                      | 561      |

5. Database(s): **Embase** 1988 to 2017 Week 30, Ovid MEDLINE(R) 1946 to Present and Epub Ahead of Print, In-Process & Other Non-Indexed Citations and Ovid MEDLINE(R) Daily

| #  | Searches                                                                                   | Results |
|----|--------------------------------------------------------------------------------------------|---------|
| 1  | sickle cell disease.mp. or exp Anemia, Sickle Cell/                                        | 51510   |
| 2  | sickle cell anemia.mp. or exp Anemia, Sickle Cell/                                         | 49034   |
| 3  | 1 or 2                                                                                     | 53110   |
| 4  | erythrocyte transfusion.mp. or exp Erythrocyte Transfusion/                                | 29205   |
| 5  | exp Erythrocyte Transfusion/ or exp Blood Transfusion/ or rbc transfusion.mp.              | 228206  |
| 6  | transfusion.mp. or exp Blood Transfusion/                                                  | 320429  |
| 7  | 4 or 5 or 6                                                                                | 320429  |
| 8  | stroke.mp. or exp Stroke/                                                                  | 651609  |
| 9  | 3 and 7 and 8                                                                              | 1604    |
| 10 | remove duplicates from 9                                                                   | 1252    |
| 11 | limit 10 to "all child (0 to 18 years)" [Limit not valid in Embase; records were retained] | 1209    |
| 12 | limit 11 to yr="2010 -Current"                                                             | 782     |

6. Database(s): **Embase** 1988 to 2017 Week 30, Ovid MEDLINE(R) 1946 to Present and Epub Ahead of Print, In-Process & Other Non-Indexed Citations and Ovid MEDLINE(R) Daily

| #  | Searches                                                                                                                                                                   | Results |
|----|----------------------------------------------------------------------------------------------------------------------------------------------------------------------------|---------|
| 1  | exp moyamoya disease/ or moyamoya.mp.                                                                                                                                      | 3243    |
| 2  | sickle cell disease.mp. or exp sickle cell anemia/                                                                                                                         | 22496   |
| 3  | 1 and 2                                                                                                                                                                    | 97      |
| 4  | remove duplicates from 3                                                                                                                                                   | 94      |
| 5  | "moya moya".mp. [mp=title, abstract, original title, name of substance word, subject heading word, keyword heading word, mesh heading word, identifier, synonyms]          | 213     |
| 6  | "sickle cell anemia".mp. [mp=title, abstract, original title, name of substance word, subject heading word, keyword heading word, mesh heading word, identifier, synonyms] | 5256    |
| 7  | 2 or 6                                                                                                                                                                     | 23255   |
| 8  | 5 and 7                                                                                                                                                                    | 14      |
| 9  | 4 or 8                                                                                                                                                                     | 102     |
| 10 | remove duplicates from 9                                                                                                                                                   | 101     |



7. Database(s): **Embase** 1988 to 2017 Week 30, Ovid MEDLINE(R) 1946 to Present and Epub Ahead of Print, In-Process & Other Non-Indexed Citations and Ovid MEDLINE(R) Daily

| #  | Searches                                                                   | Results |
|----|----------------------------------------------------------------------------|---------|
| 1  | sickle cell disease.mp. or exp sickle cell anemia/                         | 22496   |
| 2  | exp tissue plasminogen activator/ or tpa.mp.                               | 33314   |
| 3  | tissue type plasminogen activator.mp. or exp tissue plasminogen activator/ | 19450   |
| 4  | t plasminogen activator.mp. or exp tissue plasminogen activator/           | 17855   |
| 5  | angiokinase.mp. or exp tissue plasminogen activator/                       | 17922   |
| 6  | ak 124.mp. or exp tissue plasminogen activator/                            | 17852   |
| 7  | tisokinase.mp. or exp tissue plasminogen activator/                        | 17857   |
| 8  | 2 or 3 or 4 or 5 or 6 or 7                                                 | 34707   |
| 9  | 1 and 8                                                                    | 15      |
| 10 | remove duplicates from 9                                                   | 15      |

8. Database(s): **Embase** 1988 to 2017 Week 30, Ovid MEDLINE(R) 1946 to Present and Epub Ahead of Print, In-Process & Other Non-Indexed Citations and Ovid MEDLINE(R) Daily

| # | Searches                                                                                                                                                                                         | Results |
|---|--------------------------------------------------------------------------------------------------------------------------------------------------------------------------------------------------|---------|
| 1 | cognition disorders/ or exp cognitive dysfunction/                                                                                                                                               | 198187  |
| 2 | exp Cognition Disorders/ or cognitive disorder.mp.                                                                                                                                               | 209031  |
| 3 | exp Developmental Disabilities/ or exp Intellectual Disability/ or exp Child Behavior Disorders/ or developmental delay.mp.                                                                      | 845290  |
| 4 | developmental disabilities.mp. or exp Developmental Disabilities/                                                                                                                                | 54991   |
| 5 | mental deficiencies.mp. or exp Intellectual Disability/                                                                                                                                          | 475427  |
| 6 | intellectual disabilities.mp. or exp Intellectual Disability/                                                                                                                                    | 477347  |
| 7 | 1 or 2 or 3 or 4 or 5 or 6                                                                                                                                                                       | 1001926 |
| 8 | sickle cell disease.mp. or exp Anemia, Sickle Cell/                                                                                                                                              | 50589   |
| 9 | ((((drepanocytic or "haemoglobin s" or "hemoglobin s" or "Hb SS" or hbs or sickle or "sickle cell" or sickling or ss) adj2 (anaemia* or anemia* or disease* or disorder*)) or drepanocytemia* or | 51089   |

|    |                                                                                                                                                                                                                                                                                                                                                |         |
|----|------------------------------------------------------------------------------------------------------------------------------------------------------------------------------------------------------------------------------------------------------------------------------------------------------------------------------------------------|---------|
|    | drepanocytoses or drepanocytosis or "haemoglobin SS" or "hemoglobin SS" or meniscocytoses or meniscocytosis).ti,ab,hw,kw.                                                                                                                                                                                                                      |         |
| 10 | 8 or 9                                                                                                                                                                                                                                                                                                                                         | 53551   |
| 11 | cognitive disorder.mp. or exp cognitive defect/                                                                                                                                                                                                                                                                                                | 130226  |
| 12 | exp intellectual impairment/                                                                                                                                                                                                                                                                                                                   | 384959  |
| 13 | ((cognitive or cognition or developmental or intellectual) adj3 (disorder* or defect* or disabilit* or dysfunction* or impairment* or declin*)) or "developmental delay" or "developmentally delayed" or "developmentally disabled" or "executive dysfunction*" or "intellectually disabled" or overinclusion or "response interference*").mp. | 477505  |
| 14 | 7 or 11 or 12 or 13                                                                                                                                                                                                                                                                                                                            | 1114853 |
| 15 | 10 and 14                                                                                                                                                                                                                                                                                                                                      | 1356    |
| 16 | remove duplicates from 15                                                                                                                                                                                                                                                                                                                      | 1173    |

9. Database(s): **Embase** 1988 to 2017 Week 30, Ovid MEDLINE(R) 1946 to Present and Epub Ahead of Print, In-Process & Other Non-Indexed Citations and Ovid MEDLINE(R) Daily

| # | Searches                                                                                                                                                                    | Results |
|---|-----------------------------------------------------------------------------------------------------------------------------------------------------------------------------|---------|
| 1 | cognition disorders/ or exp cognitive dysfunction/                                                                                                                          | 198187  |
| 2 | exp Cognition Disorders/ or cognitive disorder.mp.                                                                                                                          | 209031  |
| 3 | exp Developmental Disabilities/ or exp Intellectual Disability/ or exp Child Behavior Disorders/ or developmental delay.mp.                                                 | 845290  |
| 4 | developmental disabilities.mp. or exp Developmental Disabilities/                                                                                                           | 54991   |
| 5 | mental deficiencies.mp. or exp Intellectual Disability/                                                                                                                     | 475427  |
| 6 | intellectual disabilities.mp. or exp Intellectual Disability/                                                                                                               | 477347  |
| 7 | 1 or 2 or 3 or 4 or 5 or 6                                                                                                                                                  | 1001926 |
| 8 | sickle cell disease.mp. or exp Anemia, Sickle Cell/                                                                                                                         | 50589   |
| 9 | ((drepanocytic or "haemoglobin s" or "hemoglobin s" or "Hb SS" or hbs or sickle or "sickle cell" or sickling or ss) adj2 (anaemia* or anemia* or disease* or disorder*)) or | 51089   |

|    |                                                                                                                                                                                                                                                                                                                                                |         |
|----|------------------------------------------------------------------------------------------------------------------------------------------------------------------------------------------------------------------------------------------------------------------------------------------------------------------------------------------------|---------|
|    | drepanocytomia* or drepanocytoses or drepanocytosis or "haemoglobin SS" or "hemoglobin SS" or meniscocytoses or meniscocytosis).ti,ab,hw,kw.                                                                                                                                                                                                   |         |
| 10 | 8 or 9                                                                                                                                                                                                                                                                                                                                         | 53551   |
| 11 | cognitive disorder.mp. or exp cognitive defect/                                                                                                                                                                                                                                                                                                | 130226  |
| 12 | exp intellectual impairment/                                                                                                                                                                                                                                                                                                                   | 384959  |
| 13 | ((cognitive or cognition or developmental or intellectual) adj3 (disorder* or defect* or disabilit* or dysfunction* or impairment* or declin*)) or "developmental delay" or "developmentally delayed" or "developmentally disabled" or "executive dysfunction*" or "intellectually disabled" or overinclusion or "response interference*").mp. | 477505  |
| 14 | 7 or 11 or 12 or 13                                                                                                                                                                                                                                                                                                                            | 1114853 |
| 15 | 10 and 14                                                                                                                                                                                                                                                                                                                                      | 1356    |
| 16 | remove duplicates from 15                                                                                                                                                                                                                                                                                                                      | 1173    |

10. Searched on July 20, 2017  
Database(s): **Embase** 1988 to 2017 Week 30, Ovid MEDLINE(R) 1946 to Present and Epub Ahead of Print, In-Process & Other Non-Indexed Citations and Ovid MEDLINE(R) Daily

| # | Searches                                                                                                                                                                                                                                                                                                                 | Results |
|---|--------------------------------------------------------------------------------------------------------------------------------------------------------------------------------------------------------------------------------------------------------------------------------------------------------------------------|---------|
| 1 | sickle cell disease.mp. or exp Anemia, Sickle Cell/                                                                                                                                                                                                                                                                      | 50601   |
| 2 | ((drepanocytic or "haemoglobin s" or "hemoglobin s" or "Hb SS" or hbs or sickle or "sickle cell" or sickling or ss) adj2 (anaemia* or anemia* or disease* or disorder*)) or drepanocytomia* or drepanocytoses or drepanocytosis or "haemoglobin SS" or "hemoglobin SS" or meniscocytoses or meniscocytosis).ti,ab,hw,kw. | 51099   |
| 3 | 1 or 2                                                                                                                                                                                                                                                                                                                   | 53563   |
| 4 | magnetic resonance imaging.mp. or exp Magnetic Resonance Imaging/                                                                                                                                                                                                                                                        | 1226802 |
| 5 | silent stroke.mp.                                                                                                                                                                                                                                                                                                        | 253     |
| 6 | exp Brain Ischemia/ or Ischemic stroke.mp. or exp Ischemic Attack, Transient/                                                                                                                                                                                                                                            | 267127  |

|    |                                              |        |
|----|----------------------------------------------|--------|
| 7  | Hemorrhagic stroke.mp.                       | 9766   |
| 8  | Lacunar infarcts.mp. or exp Stroke, Lacunar/ | 4755   |
| 9  | 5 or 6 or 7 or 8                             | 274886 |
| 10 | 3 and 4                                      | 2493   |
| 11 | 9 and 10                                     | 390    |
| 12 | exp transient ischemic attack/               | 47886  |
| 13 | exp brain hemorrhage/                        | 167433 |
| 14 | 12 or 13                                     | 209071 |
| 15 | 9 or 14                                      | 403461 |
| 16 | 10 and 15                                    | 451    |
| 17 | remove duplicates from 16                    | 381    |
| 18 | limit 17 to yr="2010 -Current"               | 227    |
